# Supplementary material
Source: publisher figshare collection journal article supplement (https://asha.figshare.com/articles/dataset/_/12869717)
Supplement: Supplementary file 1 [file 1]

## Supplemental Material S6. Treatments for hyperacusis.

|                                              | Hearing Aids | Ear wax removal | Ear Infection Cure | Information leaflets | Education | Sound Devices | Ear plugs | Counselling | Counselling Groups | Surgery | CBT | TRT | Pink Noise Therapy | Anti-Depressants | Anxiolytics | Night sedation | Alternative Therapies                                                                                                                                          |
|----------------------------------------------|--------------|-----------------|--------------------|----------------------|-----------|---------------|-----------|-------------|--------------------|---------|-----|-----|--------------------|------------------|-------------|----------------|----------------------------------------------------------------------------------------------------------------------------------------------------------------|
| Amplifon                                     | Yes          | No              | No                 | No                   | No        | Yes           | No        | No          | No                 | No      | Yes | No  | No                 | No               | No          | No             | No                                                                                                                                                             |
| Action on Hearing Loss                       | Yes          | No              | No                 | No                   | No        | Yes           | Yes       | No          | No                 | No      | No  | No  | Yes                | No               | No          | No             | No                                                                                                                                                             |
| American Speech-Language-Hearing Association | Yes          | No              | No                 | Yes                  | Yes       | Yes           | No        | Yes         | Yes                | No      | Yes | Yes | No                 | No               | No          | No             | No                                                                                                                                                             |
| British Tinnitus Association                 | No           | No              | No                 | Yes                  | Yes       | Yes           | No        | No          | No                 | No      | Yes | No  | No                 | No               | No          | No             | No                                                                                                                                                             |
| Dizziness & Balance                          | No           | No              | No                 | No                   | No        | Yes           | Yes       | No          | No                 | Yes     | Yes | Yes | No                 | Yes              | Yes         | No             | No                                                                                                                                                             |
| Hear.com                                     | No           | No              | No                 | No                   | No        | Yes           | No        | Yes         | No                 | No      | Yes | No  | Yes                | No               | No          | No             | No                                                                                                                                                             |
| Hidden Hearing                               | Yes          | No              | No                 | No                   | No        | Yes           | No        | No          | No                 | No      | No  | No  | No                 | No               | No          | No             | No                                                                                                                                                             |
| Hyperacusis Focus                            | Yes          | No              | No                 | No                   | No        | Yes           | No        | Yes         | Yes                | Yes     | Yes | Yes | Yes                | Yes              | Yes         | Yes            | <ul style="list-style-type: none"> <li>• Acupuncture</li> <li>• Hypnosis</li> <li>• Relaxation</li> <li>• Massage</li> <li>• Multimodal stimulation</li> </ul> |
| Hyperacusis.net                              | No           | No              | No                 | No                   | No        | Yes           | Yes       | No          | No                 | No      | No  | Yes | Yes                | No               | No          | No             | No                                                                                                                                                             |
| NHS                                          | No           | No              | No                 | Yes                  | Yes       | Yes           | Yes       | Yes         | Yes                | No      | Yes | No  | No                 | No               | No          | No             | No                                                                                                                                                             |
| South Tees NHS                               | No           | No              | No                 | No                   | No        | Yes           | No        | No          | No                 | No      | No  | No  | No                 | No               | No          | No             | No                                                                                                                                                             |
| University of California San Francisco       | No           | No              | No                 | No                   | No        | Yes           | Yes       | Yes         | No                 | No      | No  | Yes | No                 | No               | No          | No             | No                                                                                                                                                             |
| Vestibular.org                               | No           | No              | No                 | No                   | No        | No            | No        | No          | No                 | No      | No  | Yes | No                 | No               | No          | No             | <ul style="list-style-type: none"> <li>• Low salt diet</li> <li>• Anti-inflammatory medicine in the cochlear</li> </ul>                                        |
| WebMD                                        | No           | No              | No                 | No                   | No        | Yes           | Yes       | No          | No                 | No      | No  | No  | No                 | No               | No          | No             | <ul style="list-style-type: none"> <li>• Acupuncture</li> <li>• Relaxation</li> </ul>                                                                          |
| Wikipedia                                    | No           | No              | No                 | No                   | No        | No            | No        | Yes         | Yes                | No      | Yes | Yes | Yes                | No               | No          | No             | No                                                                                                                                                             |
