# Supplementary material
Source: publisher figshare collection journal article supplement (https://asha.figshare.com/articles/dataset/_/12869717)
Supplement: Supplementary file 1 [file 1]

## Sheet: Sheet1
Supplemental material, Smith et al., “The Content and Quality of Information About Hyperacusis Presented Online,” AJA, https://doi.org/10.1044/2020_AJA-19-00074
Supplemental Material S7. DISCERN scores.
DICERN Question	Amplifon	Rater 1	Rater 2	AOHL	Rater 1	Rater 3	ASHA	Rater 1	Rater 2	BTA	Rater 1	Rater 4	D&B	Rater 1	Rater 2	Hear.com	Rater 1	Rater 3	Hidden Hearing	Rater 1	Rater 3	Hyperacusis Focus	Rater 1	Rater 4	Hyperacusis.net	Rater 1	Rater 4	NHS	Rater 1	Rater 4	South Tees NHS	Rater 1	Rater 4	UCSF	Rater 1	Rater 4	Vestibular.org	Rater 1	Sandra	WebMD	Rater 1	Rater 4	Wikipedia	Rater 1	Rater 3
Question 1	2.5	3	2	3.5	4	3	3.5	4	3	2	3	1	3.5	4	3	2.5	3	2	1	1	1	4.5	5	4	3	4	2	2	3	1	1	1	1	1.5	2	1	3	3	3	2.5	4	1	2	2	2
Question 2	2.5	3	2	4	4	4	3.5	4	3	1.5	2	1	3.5	4	3	2.5	3	2	1	1	1	5	5	5	2	3	1	2	3	1	1	1	1	1.5	2	1	3	3	3	2	3	1	2	2	2
Question 3	2.5	3	2	4	4	4	4.5	5	4	3.5	4	3	4	5	3	3	3	3	2.5	3	2	5	5	5	3	3	3	4.5	4	5	2	2	2	3.5	3	4	2	2	2	3.5	3	4	3.5	4	3
Question 4	1	1	1	3	3	3	5	5	5	1	1	1	4.5	5	4	1	1	1	1	1	1	5	5	5	1.5	2	1	1.5	2	1	1	1	1	1	1	1	2	2	2	2.5	4	1	4.5	5	4
Question 5	1	1	1	5	5	5	1.5	1	2	1	1	1	4.5	5	4	1	1	1	1	1	1	3.5	2	5	1.5	1	2	4	3	5	1	1	1	1	1	1	1	1	1	1.5	2	1	3	2	4
Question 6	2.5	3	2	5	5	5	4	4	4	4.5	4	5	4	5	3	2.5	3	2	1.5	2	1	5	5	5	2	3	1	4.5	4	5	1	1	1	3.5	3	4	2.5	3	2	3.5	3	4	5	5	5
Question 7	1	1	1	3.5	4	3	5	5	5	4.5	5	4	2	3	1	1	1	1	1	1	1	4	3	5	3.5	4	3	3.5	4	3	1	1	1	1	1	1	1	1	1	1	1	1	3.5	3	4
Question 8	2.5	3	2	3	3	3	2.5	3	2	2.5	2	3	2	3	1	1	1	1	1	1	1	4.5	4	5	2	3	1	4	5	3	1.5	2	1	1	1	1	2	2	2	4	3	5	2.5	3	2
Question 9	2.5	3	2	4	4	4	3	4	2	1.5	2	1	3.5	4	3	2	2	2	2	2	2	5	5	5	3	3	3	4	3	5	2	2	2	3	2	4	2	2	2	2.5	3	2	3	3	3
Question 10	2.5	3	2	4	4	4	3.5	4	3	2.5	3	2	3.5	5	2	3	3	3	2	2	2	5	5	5	2	3	1	2.5	4	1	1	1	1	3	2	4	1	1	1	2	3	1	3	3	3
Question 11	1	1	1	1	1	1	1	1	1	1	1	1	3	4	2	2.5	2	3	1	1	1	2.5	3	2	1.5	2	1	1	1	1	1	1	1	1	1	1	1	1	1	1	1	1	1	1	1
Question 12	1	1	1	1	1	1	1.5	1	2	1	1	1	1.5	2	1	1	1	1	1	1	1	2	3	1	2	3	1	1.5	2	1	1	1	1	1	1	1	1	1	1	1	1	1	1	1	1
Question 13	2	3	1	3.5	4	3	3	4	2	2.5	3	2	2.5	4	1	2.5	2	3	1.5	2	1	3.5	5	2	2	3	1	2.5	4	1	1.5	2	1	2	3	1	1	1	1	2	3	1	2.5	3	2
Question 14	4	5	3	4.5	5	4	4.5	5	4	3.5	4	3	4.5	5	4	3	3	3	1	1	1	5	5	5	2.5	2	3	5	5	5	1	1	1	4	3	5	1.5	1	2	4.5	4	5	3	4	2
Question 15	1	1	1	1.5	2	1	3.5	4	3	2	3	1	1.5	2	1	1	1	1	1	1	1	1.5	2	1	1.5	2	1	2.5	4	1	1	1	1	1	1	1	1	1	1	1.5	2	1	1	1	1
Question 16	1.5	2	1	4	4	4	3	4	2	3	3	3	3	4	2	2	2	2	1.5	1	2	5	5	5	2.5	3	2	3	3	3	1	1	1	2.5	2	3	2	2	2	2.5	3	2	2.5	3	2
Total score	31	37	25	54.5	57	52	52.5	58	47	37.5	42	33	51	64	38	31.5	32	31	21	22	20	66	67	65	35.5	44	27	48	54	42	19	20	18	31.5	29	34	27	27	27	37.5	43	32	43	45	41
Average score	1.9375	2.3	1.56	3.40625	3.6	3.3	3.28125	3.63	2.94	2.34375	2.6	2.1	3.1875	4	2.4	1.96875	2	1.94	1.3125	1.38	1.25	4.125	4.19	4.06	2.21875	2.75	1.69	3	3.38	2.63	1.1875	1.25	1.13	1.96875	1.81	2.13	1.6875	1.69	1.69	2.34375	2.69	2	2.6875	2.8	2.56
