# Supplementary material
Source: publisher figshare collection journal article supplement (https://asha.figshare.com/articles/dataset/_/12869717)
Supplement: Supplementary file 2 [file 1]

#### Supplemental Material S4. Onset/causes.

| Website                                      | Loud Noise | High pitched noise | Background Noise | Air Travel | Ear Sensitising Medication | Other Medication | Surgery | Head Trauma | Glue Ear | History of Ear Infections | Family History of Ear Infections | Other                                                                                                                                                                           |
|----------------------------------------------|------------|--------------------|------------------|------------|----------------------------|------------------|---------|-------------|----------|---------------------------|----------------------------------|---------------------------------------------------------------------------------------------------------------------------------------------------------------------------------|
| Amplifon                                     | No         | No                 | No               | No         | No                         | No               | No      | No          | No       | No                        | No                               | <ul style="list-style-type: none"> <li>• Post-Traumatic Stress Disorder</li> </ul>                                                                                              |
| Action on Hearing Loss                       | Yes        | No                 | No               | No         | No                         | No               | No      | Yes         | No       | No                        | No                               | <ul style="list-style-type: none"> <li>• Altered brain chemistry.</li> <li>• Processing of sound signals by the brain</li> </ul>                                                |
| American Speech-Language-Hearing Association | Yes        | Yes                | No               | No         | No                         | Yes              | No      | Yes         | No       | Yes                       | No                               |                                                                                                                                                                                 |
| British Tinnitus Association                 | Yes        | Yes                | Yes              | No         | No                         | No               | No      | Yes         | No       | No                        | No                               |                                                                                                                                                                                 |
| Dizziness & Balance                          | Yes        | No                 | No               | No         | No                         | No               | Yes     | No          | No       | No                        | No                               | <ul style="list-style-type: none"> <li>• Meniere’s disease,</li> <li>• Highly vigilant or obsessive people</li> <li>• Asperger’s syndrome,</li> <li>• Brain Migraine</li> </ul> |
| Hear.com                                     | Yes        | No                 | No               | No         | No                         | No               | No      | Yes         | No       | Yes                       | No                               | <ul style="list-style-type: none"> <li>• Autoimmune disorder,</li> <li>• birth defects</li> </ul>                                                                               |
| Hidden Hearing                               | Yes        | No                 | No               | No         | No                         | No               | No      | Yes         | No       | No                        | No                               |                                                                                                                                                                                 |
| Hyperacusis Focus                            | Yes        | Yes                | Yes              | No         | Yes                        | Yes              | Yes     | Yes         | No       | No                        | No                               | <ul style="list-style-type: none"> <li>• Damage to inner ear.</li> <li>• Deficiency in magnesium or pyridoxine.</li> <li>• Genetic</li> </ul>                                   |
| Hyperacusis.net                              | Yes        | Yes                | Yes              | No         | No                         | Yes              | Yes     | Yes         | No       | No                        | No                               |                                                                                                                                                                                 |
| NHS                                          | Yes        | No                 | No               | No         | No                         | Yes              | Yes     | Yes         | Yes      | Yes                       | No                               |                                                                                                                                                                                 |
| South Tees NHS                               | Yes        | No                 | No               | No         | No                         | No               | No      | Yes         | No       | No                        | No                               |                                                                                                                                                                                 |
| University of California San Francisco       | Yes        | Yes                | Yes              | No         | No                         | Yes              | Yes     | Yes         | No       | Yes                       | No                               |                                                                                                                                                                                 |
| Vestibular.org                               | No         | Yes                | Yes              | No         | No                         | Yes              | Yes     | Yes         | No       | No                        | No                               | <ul style="list-style-type: none"> <li>• Brain chemistry</li> <li>• Dysfunction circulatory changes</li> </ul>                                                                  |
| WebMD                                        | Yes        | No                 | Yes              | No         | No                         | Yes              | No      | Yes         | No       | No                        | No                               |                                                                                                                                                                                 |
| Wikipedia                                    | Yes        | No                 | No               | No         | Yes                        | Yes              | Yes     | Yes         | No       | Yes                       | No                               | <ul style="list-style-type: none"> <li>• Lyme disease</li> <li>• Meniere’s disease</li> </ul>                                                                                   |
