# Supplementary material
Source: publisher figshare collection journal article supplement (https://asha.figshare.com/articles/dataset/_/12869717)
Supplement: Supplementary file 3 [file 1]

**Supplemental Material S1.** Data extraction form.

**Hyperacusis Website Information Analysis – Extraction Form**

|                                                                                                                    |
|--------------------------------------------------------------------------------------------------------------------|
| <b>Project Title</b> – The content and quality of hyperacusis information on websites used by doctors and patients |
|--------------------------------------------------------------------------------------------------------------------|

**Date of Analysis** –

**Reviewer** –

|                                                                                                                                                                                                                                                                                                                                                                                                                      |
|----------------------------------------------------------------------------------------------------------------------------------------------------------------------------------------------------------------------------------------------------------------------------------------------------------------------------------------------------------------------------------------------------------------------|
| <p><b><u>Aims of this Research</u></b></p> <ol style="list-style-type: none"><li>1. Evaluate the accuracy and the reliability of the information relating to hyperacusis</li><li>2. Examine the content for key concepts related but not limited to the symptoms, causes and treatment of hyperacusis.</li><li>3. Assess whether the content of these websites is suitable for patients and/or clinicians.</li></ol> |
|----------------------------------------------------------------------------------------------------------------------------------------------------------------------------------------------------------------------------------------------------------------------------------------------------------------------------------------------------------------------------------------------------------------------|



**This extraction form is comprised of 3 sections**

1. Website Information' (pages 2-6)
2. 'Content Analysis' (pages 7-10)
3. DISCERN Instrument (pages 11-16)

### **Website Information**

**Website Name –**

**URL –**

| <b>Produced by</b> | <b>Yes / No</b> | <b>If yes, further Comments that describe the provider of this website</b> |
|--------------------|-----------------|----------------------------------------------------------------------------|
| Government         |                 |                                                                            |
| Not for profit     |                 |                                                                            |
| Commercial sector  |                 |                                                                            |
| Other – what?      |                 |                                                                            |

| <b>Purpose</b>                                                                                                                     | <b>Comment briefly (in your own words) on what information the website gives on this purpose</b> |
|------------------------------------------------------------------------------------------------------------------------------------|--------------------------------------------------------------------------------------------------|
| <b><i>Stated purpose from the website as a whole (there may not be one)</i></b><br><i>e.g. NHS Homepage</i>                        |                                                                                                  |
| <b><i>Stated purpose of the hyperacusis webpage of that website (there may not be one)</i></b><br><i>e.g. NHS Hyperacusis Page</i> |                                                                                                  |
| <b>Disease management</b>                                                                                                          |                                                                                                  |
| <b>Disease prevention</b>                                                                                                          |                                                                                                  |
| <b>Evaluation of information from other sources</b><br>e.g. are studies from journals referenced and described                     |                                                                                                  |
| <b>Developments in the understanding of the disease</b><br>e.g. research                                                           |                                                                                                  |
| <b>Diagnostic tests or procedures used by clinicians</b>                                                                           |                                                                                                  |
| <b>Sale of products related to Hyperacusis</b>                                                                                     |                                                                                                  |
| <b>Promotion of complimentary therapies</b> (alternative medicines that fall outside of mainstream healthcare)                     |                                                                                                  |
| <b>Promotion of self-help</b>                                                                                                      |                                                                                                  |
| <b>Raise funds for Hyperacusis patients/research</b>                                                                               |                                                                                                  |
| <b>Other</b>                                                                                                                       |                                                                                                  |

| <b>Audience</b>           | <b>Comment on all that apply</b> |
|---------------------------|----------------------------------|
| General public            |                                  |
| Patients with hyperacusis |                                  |

|                                                           |  |
|-----------------------------------------------------------|--|
| GPs                                                       |  |
| Other healthcare professionals                            |  |
| Academics                                                 |  |
| University students                                       |  |
| Friends/family of patients                                |  |
| Government                                                |  |
| Other                                                     |  |
| Is the information appropriate to the target audience(s)? |  |

|                                                                                                      |  |
|------------------------------------------------------------------------------------------------------|--|
| <b>Functionality</b>                                                                                 |  |
| How many separate webpages are there relating to hyperacusis (e.g. 1)                                |  |
| Is there a search function + comments on how easy it is to use                                       |  |
| List the top 3 results if search 'Hyperacusis' ( <b>only if there is a search function present</b> ) |  |
| Is there an online glossary?                                                                         |  |
| Are there any error pages within the search function?                                                |  |
| Other comments on functionality                                                                      |  |

|                  |  |
|------------------|--|
| <b>Usability</b> |  |
|------------------|--|

| <b><i>Does the site use...</i></b>          |          | <b>Comments on if they are beneficial to hyperacusis (<b>your subjective opinion</b>)</b> |
|---------------------------------------------|----------|-------------------------------------------------------------------------------------------|
| Text links to pages within the same website | Yes / No |                                                                                           |
| Graphic image navigation buttons            | Yes / No |                                                                                           |
| Image maps                                  | Yes / No |                                                                                           |
| Drop-down menu                              | Yes / No |                                                                                           |
| URLs to other pages                         | Yes / No |                                                                                           |
| Audio clips                                 | Yes / No |                                                                                           |
| Video clips                                 | Yes / No |                                                                                           |

|                                                                                                                                                        |  |
|--------------------------------------------------------------------------------------------------------------------------------------------------------|--|
| <b>Overall comments on ease of navigation</b>                                                                                                          |  |
| Rating on ease of navigation (1-10)<br><i>1 – website is broken/all error pages</i><br><i>10 – every page works AND very intuitive and easy to use</i> |  |
| Comments on use of colour and backgrounds on website                                                                                                   |  |

|                                                                       |  |
|-----------------------------------------------------------------------|--|
| Are adverts used on website                                           |  |
| If yes, do the adverts add/subtract from the usability of the website |  |
| General comments about quality of English                             |  |

| <b>Mobile Functionality</b> |          |                 |
|-----------------------------|----------|-----------------|
| <i>Does the site have.</i>  |          | <i>Comments</i> |
| A mobile site               | Yes / No |                 |
| A mobile app (iOS/Android)  | Yes / No |                 |

|                                                                                    |  |
|------------------------------------------------------------------------------------|--|
| Is the supplier contactable and how?                                               |  |
| If yes, in what context?<br>e.g. as an information source, to make a donation etc. |  |

|                                                                                                                     |
|---------------------------------------------------------------------------------------------------------------------|
| <b>Details of accreditations: (e.g. awards or certification showing competency, success / endorsements)</b><br><br> |
| <b>Where on the site are accreditation details located? (e.g. about section, accessibility page etc.)</b><br><br>   |

| <b>This site links to</b>                                |          | <b>Comments e.g. prominence</b> |
|----------------------------------------------------------|----------|---------------------------------|
| <b>The British Tinnitus Association (BTA)</b>            | Yes / No |                                 |
| Action on Hearing Loss                                   | Yes / No |                                 |
| Amplifon                                                 | Yes / No |                                 |
| WebMD                                                    | Yes / No |                                 |
| Wikipedia                                                | Yes / No |                                 |
| <b>National Health Service (NHS)</b>                     | Yes / No |                                 |
| <b>National Institute for Clinical excellence (NICE)</b> | Yes / No |                                 |
| Hyperacusis.net                                          | Yes / No |                                 |
| Department of Health                                     | Yes / No |                                 |
| Other                                                    |          |                                 |

## Content Analysis

**For each of the terms below, does the website use these words verbatim or similar phrasing that would have the same meaning**

**Context and Comments: describe briefly by quoting or in your own words any extra information that may be relevant**

### Signs & Symptoms

|                           | Yes / No | Context + Comments |
|---------------------------|----------|--------------------|
| Decreased sound tolerance |          |                    |
| Annoyance                 |          |                    |
| Ear pain                  |          |                    |
| Sudden hearing loss       |          |                    |
| Chronic hearing loss      |          |                    |
| Anxiety/Panic Attacks     |          |                    |
| Depression                |          |                    |
| Stress                    |          |                    |
| Anger                     |          |                    |
| Fear                      |          |                    |
| Phonophobia               |          |                    |
| Misophonia                |          |                    |
| Lower Quality of Life     |          |                    |
| Distress                  |          |                    |
| Sleep Problems            |          |                    |
| Avoidance Behaviour       |          |                    |
| Other                     |          |                    |

### Onset / Causes

|                                  | Yes / No | Context + Comments |
|----------------------------------|----------|--------------------|
| Loud Noise                       |          |                    |
| High-pitched noise               |          |                    |
| Background noise                 |          |                    |
| Air travel                       |          |                    |
| Ear sensitising medication       |          |                    |
| Other medication                 |          |                    |
| Surgery                          |          |                    |
| Head trauma                      |          |                    |
| Glue ear                         |          |                    |
| History of ear infections        |          |                    |
| Family History of ear infections |          |                    |
| Other                            |          |                    |

### Investigations

|  | Yes / No | Comments + Context |
|--|----------|--------------------|
|--|----------|--------------------|

|                                |  |  |
|--------------------------------|--|--|
| GP                             |  |  |
| Ear nose and throat Specialist |  |  |
| Audiologist                    |  |  |
| Other                          |  |  |

#### Associated Conditions

|                                       | Yes / No | Comments + Context |
|---------------------------------------|----------|--------------------|
| Tinnitus                              |          |                    |
| Bell's Palsy                          |          |                    |
| Migraines                             |          |                    |
| Lyme Disease                          |          |                    |
| Tay-Sachs Disease                     |          |                    |
| Meniere's Disease                     |          |                    |
| William's Disease                     |          |                    |
| Addison's Disease                     |          |                    |
| Post-Traumatic Stress Disorder (PTSD) |          |                    |
| Hearing Loss                          |          |                    |
| Depression                            |          |                    |
| Autism Spectrum Disorder              |          |                    |
| Other                                 |          |                    |

#### Treatments

|                                        | Yes / No | Comments + Context |
|----------------------------------------|----------|--------------------|
| Hearing aids                           |          |                    |
| Ear wax removal                        |          |                    |
| Ear infection cure                     |          |                    |
| Information leaflets                   |          |                    |
| Education                              |          |                    |
| Sound Devices                          |          |                    |
| Earplugs/Earmuffs                      |          |                    |
| Individual Counselling                 |          |                    |
| Counselling Groups                     |          |                    |
| Surgery                                |          |                    |
| Cognitive behavioural Therapy (CBT)    |          |                    |
| Tinnitus retraining therapy            |          |                    |
| Pink Noise Therapy                     |          |                    |
| Anti-depressants                       |          |                    |
| Anxiolytics                            |          |                    |
| Night sedation                         |          |                    |
| Alternative therapies e.g. Acupuncture |          |                    |

**Does the study explicitly mention the use of these studies to back up its information?**

| <b>Levels of supporting evidence</b>                                                                                                                                 | <b>How much of each? (may be none)</b> |
|----------------------------------------------------------------------------------------------------------------------------------------------------------------------|----------------------------------------|
| 1. Cites <b>systematic reviews / meta-analyses</b>                                                                                                                   |                                        |
| 2. Cites <b>RCTs, cohort study, clinical decision rule validated in different populations</b>                                                                        |                                        |
| 3. Cites <b>consistent Retrospective Cohort, Exploratory Cohort, Ecological Study, Outcomes Research, Case-control study; or extrapolations from level 2 studies</b> |                                        |
| 4. Cites <b>case-series study or extrapolations from level 3 studies</b>                                                                                             |                                        |
| 5. Cites <b>expert opinion without explicit critical appraisal, or based on physiology, bench research or first principles</b>                                       |                                        |

**Further notes on the webpage that have not been addressed in any other sections of this extraction form**

|                                                                                                                                                                |  |
|----------------------------------------------------------------------------------------------------------------------------------------------------------------|--|
| <b>Date last updated</b> (it might not say, if so put N/A)                                                                                                     |  |
| <b>What is the update related to?</b> (e.g. are there any stated improvements being made to the webpage to provide detail on certain sections, if not say N/A) |  |

### **Discern Instrument**

'A brief questionnaire which provides users with a valid and reliable way of assessing the quality of written information on treatment choices for a health problem' (DISCERN website)

This has been adapted from the official DISCERN tool and a similar tool used by a study which examined 'The content and quality of tinnitus information on websites accessed by GPs'

More details can be found at <http://www.discern.org.uk/>

### **Section 1 – Is the publication reliable?**

#### **1. Are the aims clear?**

| No        |   | Partially |   | Yes |
|-----------|---|-----------|---|-----|
| 1         | 2 | 3         | 4 | 5   |
| Comments: |   |           |   |     |

HINT: Look for a clear indication at the beginning of:

- what it is about
- what it is meant to cover (and what topics are meant to be excluded)
- who might find it useful

If the answer to Question 1 is 'No', go directly to Question 3

#### **2. Does it achieve its aims?**

| No        |   | Partially |   | Yes |
|-----------|---|-----------|---|-----|
| 1         | 2 | 3         | 4 | 5   |
| Comments: |   |           |   |     |

HINT: Consider whether the website provides the information it aimed to as outlined in Question 1

#### **3. Is it relevant?**

| No        |   | Partially |   | Yes |
|-----------|---|-----------|---|-----|
| 1         | 2 | 3         | 4 | 5   |
| Comments: |   |           |   |     |

HINT: Consider whether:

- the website addresses the questions that readers might ask.
- recommendations and suggestions concerning treatment choices are realistic or appropriate.



**4. Is it clear what sources of information were used to compile the website (other than the author or producer)?**

| No        |   | Partially |   | Yes |
|-----------|---|-----------|---|-----|
| 1         | 2 | 3         | 4 | 5   |
| Comments: |   |           |   |     |

**HINT**

- Check whether the main claims or statements made about treatment choices are accompanied by a reference to the sources used as evidence, e.g. a research study or expert opinion.
- Look for a means of checking the sources used such as a bibliography/reference list or the addresses of the experts or organisations quoted, or external links to the online sources.

Rating note: In order to score a full '5' the site should fulfil both hints. Lists of additional sources of support and information (Question 7) are not necessarily sources of evidence for the current publication.

**5. Is it clear when the information used or reported in the publication was produced?**

| No        |   | Partially |   | Yes |
|-----------|---|-----------|---|-----|
| 1         | 2 | 3         | 4 | 5   |
| Comments: |   |           |   |     |

**HINT: Look for:**

- dates of the main sources of information used to compile the website
- date of latest revisions

**6. Is it balanced and unbiased?**

| No        |   | Partially |   | Yes |
|-----------|---|-----------|---|-----|
| 1         | 2 | 3         | 4 | 5   |
| Comments: |   |           |   |     |

**HINT: Look for:**

- a clear indication of whether the website was produced from a personal or objective point of view
- evidence that a *range* of sources of information was used to compile the website, e.g. more than one research study or expert
- evidence of an external assessment of the website.

**Be wary if:**

- the website focuses on the advantages or disadvantages of one particular treatment choice without reference to other possible choices
- the website relies primarily on evidence from single cases (which may not be typical of people with this condition or of responses to a particular treatment)
- the information is presented in a sensational, emotive or alarmist way.

**7. Does it provide details of additional sources of support and information?**

| No       |   | Partially |   | Yes |
|----------|---|-----------|---|-----|
| 1        | 2 | 3         | 4 | 5   |
| Comments |   |           |   |     |

**HINT** Look for suggestions for further reading or for details of other organisations providing advice and information about the condition and treatment choices.

### 8. Does it refer to areas of uncertainty?

| No        |   | Partially |   | Yes |
|-----------|---|-----------|---|-----|
| 1         | 2 | 3         | 4 | 5   |
| Comments: |   |           |   |     |

HINT

- Look for discussion of the gaps in knowledge or differences in expert opinion concerning treatment choices.
- Be wary if the website implies that a treatment choice affects everyone in the same way, e.g. 100% success rate with a particular treatment.

### Section 2 – How good is the quality of information on treatment choices?

N.B. The questions apply to the treatment (or treatments) described in the website. Self-care is considered a form of treatment throughout this section.

### 9. Does it describe how each treatment works?

| No        |   | Partially |   | Yes |
|-----------|---|-----------|---|-----|
| 1         | 2 | 3         | 4 | 5   |
| Comments: |   |           |   |     |

HINT: Look for a description of how a treatment acts on the body to achieve its effect.

### 10. Does it describe the benefits of each treatment?

| No        |   | Partially |   | Yes |
|-----------|---|-----------|---|-----|
| 1         | 2 | 3         | 4 | 5   |
| Comments: |   |           |   |     |

HINT: Benefits can include controlling or getting rid of symptoms, preventing recurrence of the condition and eliminating the condition, both short-term and long-term.

### 11. Does it describe the risks of each treatment?

| No        |   | Partially |   | Yes |
|-----------|---|-----------|---|-----|
| 1         | 2 | 3         | 4 | 5   |
| Comments: |   |           |   |     |

HINT: Risks can include side-effects, complications and adverse reactions to treatment, both short-term and long-term.

**12. Does it describe what would happen if no treatment is used?**

| No        |   | Partially |   | Yes |
|-----------|---|-----------|---|-----|
| 1         | 2 | 3         | 4 | 5   |
| Comments: |   |           |   |     |

HINT: Look for a description of the risks and benefits of postponing treatment, of watchful waiting (i.e. monitoring how the condition progresses without treatment) or of permanently forgoing treatment.

**13. Does it describe how the treatment choices affect overall quality of life?**

| No        |   | Partially |   | Yes |
|-----------|---|-----------|---|-----|
| 1         | 2 | 3         | 4 | 5   |
| Comments: |   |           |   |     |

HINT: Look for:

- description of the effects of the treatment choices on day-to-day activity
- description of the effects of the treatment choices on relationships with family, friends and carers.

**14. Is it clear that there may be more than one possible treatment choice?**

| No        |   | Partially |   | Yes |
|-----------|---|-----------|---|-----|
| 1         | 2 | 3         | 4 | 5   |
| Comments: |   |           |   |     |

HINT: Look for:

- a description of who is most likely to benefit from each treatment choice mentioned, and under what circumstances
- suggestions of alternatives to consider or investigate further (including choices not fully described in the publication) before deciding whether to select or reject a particular treatment choice.

**15. Does it provide support for shared decision-making?**

| No        |   | Partially |   | Yes |
|-----------|---|-----------|---|-----|
| 1         | 2 | 3         | 4 | 5   |
| Comments: |   |           |   |     |

HINT Look for suggestions of things to discuss with family, friends, doctors or other health professionals concerning treatment choices.

### **Section 3 – Overall Rating of the Website**

**16. Based on the answers to all of the above questions, rate the overall quality of the publication as a source of information about treatment choices**

| <b>Low</b>                                      |          | <b>Moderate</b>                                                  |          | <b>High</b>                        |
|-------------------------------------------------|----------|------------------------------------------------------------------|----------|------------------------------------|
| <i><b>Serious or extensive shortcomings</b></i> |          | <i><b>Potentially important but not serious shortcomings</b></i> |          | <i><b>Minimal shortcomings</b></i> |
| <b>1</b>                                        | <b>2</b> | <b>3</b>                                                         | <b>4</b> | <b>5</b>                           |

Also score overall **Quality** according to the **5-star system** for rating the quality of information based on DISCERN (Shepperd et al. 2002 Health Informatics and Libraries Journal)

**Highlight the correct option that applies (from questions 1-16)**

- If 8 or more questions score 5 = **5 stars**
- If 8 or more questions score 4 and above = **4 stars**
- If 8 or more questions score 3 and above = **3 stars**
- If 8 or more questions score 2 and above = **2 stars**
- All other combinations score **1 star**

**THE END**
