# Supplementary material
Source: publisher figshare collection journal article supplement (https://asha.figshare.com/articles/dataset/_/12869717)
Supplement: Supplementary file 4 [file 1]

## Supplemental Material S5. Associated conditions.

| Website                                      | Tinnitus | Bell's Palsy | Migraines | Lyme Disease | Tay-Sachs Disease | Meniere's Disease | Williams Syndrome | Addison's Disease | Post-Traumatic Stress Disorder | Hearing Loss | Depression | Autism Spectrum Disorder | Other                                                                                                                                                                                                                                                                                                                                                                              |
|----------------------------------------------|----------|--------------|-----------|--------------|-------------------|-------------------|-------------------|-------------------|--------------------------------|--------------|------------|--------------------------|------------------------------------------------------------------------------------------------------------------------------------------------------------------------------------------------------------------------------------------------------------------------------------------------------------------------------------------------------------------------------------|
| Amplifon                                     | Yes      | No           | No        | No           | No                | No                | No                | No                | Yes                            | Yes          | Yes        | No                       |                                                                                                                                                                                                                                                                                                                                                                                    |
| Action on Hearing Loss                       | Yes      | Yes          | Yes       | Yes          | No                | Yes               | Yes               | No                | Yes                            | Yes          | Yes        | Yes                      | <ul style="list-style-type: none"> <li>• multiple sclerosis</li> <li>• photophobia</li> <li>• post head injury syndrome</li> </ul>                                                                                                                                                                                                                                                 |
| American Speech-Language-Hearing Association | Yes      | No           | Yes       | Yes          | No                | Yes               | Yes               | No                | Yes                            | Yes          | No         | No                       | <ul style="list-style-type: none"> <li>• Autoimmune disorders</li> <li>• Endocrine disorders</li> <li>• Fibromyalgia</li> <li>• Metabolic disorders,</li> <li>• Neurologic conditions</li> <li>• Perilymph fistula</li> <li>• Superior Canal Dehiscence</li> <li>• Temporomandibular joint (TMJ) disorders</li> <li>• Viral Infections of the inner ear or facial nerve</li> </ul> |
| British Tinnitus Association                 | Yes      | Yes          | Yes       | Yes          | No                | No                | Yes               | No                | No                             | Yes          | No         | Yes                      |                                                                                                                                                                                                                                                                                                                                                                                    |
| Dizziness & Balance                          | Yes      | Yes          | Yes       | No           | No                | Yes               | No                | No                | No                             | Yes          | Yes        | Yes                      | <ul style="list-style-type: none"> <li>• microvascular compression,</li> <li>• obsessive people</li> </ul>                                                                                                                                                                                                                                                                         |
| Hear.com                                     | Yes      | No           | No        | No           | No                | No                | No                | No                | No                             | No           | No         | Yes                      |                                                                                                                                                                                                                                                                                                                                                                                    |
| Hidden Hearing                               | Yes      | No           | Yes       | No           | No                | Yes               | No                | No                | Yes                            | Yes          | Yes        | No                       | <ul style="list-style-type: none"> <li>• Vitamin B6 deficiency,</li> <li>• Post viral fatigue syndrome</li> </ul>                                                                                                                                                                                                                                                                  |
| Hyperacusis Focus                            | Yes      | Yes          | Yes       | Yes          | Yes               | Yes               | Yes               | Yes               | Yes                            | Yes          | Yes        | Yes                      |                                                                                                                                                                                                                                                                                                                                                                                    |
| Hyperacusis.net                              | Yes      | No           | No        | Yes          | No                | Yes               | No                | No                | No                             | Yes          | No         | Yes                      | <ul style="list-style-type: none"> <li>• Temporomandibular joint (TMJ) disorders</li> <li>• Superior Canal Dehiscence</li> <li>• Downs syndrome</li> </ul>                                                                                                                                                                                                                         |
| NHS                                          | Yes      | Yes          | Yes       | No           | No                | Yes               | Yes               | Yes               | Yes                            | Yes          | Yes        | Yes                      |                                                                                                                                                                                                                                                                                                                                                                                    |
| South Tees NHS                               | No       | No           | No        | No           | No                | No                | No                | No                | No                             | No           | No         | No                       |                                                                                                                                                                                                                                                                                                                                                                                    |
| University of California San Francisco       | Yes      | No           | No        | No           | No                | No                | No                | No                | No                             | No           | No         | No                       | <ul style="list-style-type: none"> <li>• Autoimmune disorders</li> </ul>                                                                                                                                                                                                                                                                                                           |
| Vestibular.org                               | No       | No           | No        | No           | No                | No                | No                | No                | No                             | No           | No         | No                       | <ul style="list-style-type: none"> <li>• Autoimmune disorders</li> </ul>                                                                                                                                                                                                                                                                                                           |
| WebMD                                        | Yes      | Yes          | Yes       | Yes          | Yes               | Yes               | No                | No                | Yes                            | Yes          | Yes        | No                       | <ul style="list-style-type: none"> <li>• Temporomandibular joint (TMJ) disorders</li> <li>• Epilepsy</li> <li>• Chronic Fatigue syndrome</li> </ul>                                                                                                                                                                                                                                |
| Wikipedia                                    | Yes      | No           | Yes       | Yes          | Yes               | Yes               | Yes               | No                | Yes                            | Yes          | No         | Yes                      | <ul style="list-style-type: none"> <li>• Endolymphatic Hydrops</li> <li>• Multiple Sclerosis</li> <li>• Superior Canal Dehiscence</li> </ul>                                                                                                                                                                                                                                       |
