# Supplementary material
Source: publisher figshare collection journal article supplement (https://asha.figshare.com/articles/dataset/_/12869717)
Supplement: Supplementary file 5 [file 1]

### Supplemental Material S3. Signs and symptoms of hyperacusis.

| Website                                      | Decreased Sound Tolerance | Annoyance | Ear Pain | Hearing Loss | Anxiety/Panic Attacks | Depression | Anger | Avoidance Behaviour | Stress | Fear | Phonophobia | Misophonia | Lower QOL | Distress | Sleep problems | Other                                                                                                                                                                              |
|----------------------------------------------|---------------------------|-----------|----------|--------------|-----------------------|------------|-------|---------------------|--------|------|-------------|------------|-----------|----------|----------------|------------------------------------------------------------------------------------------------------------------------------------------------------------------------------------|
| Amplifon                                     | Yes                       | Yes       | Yes      | Yes          | Yes                   | Yes        | No    | No                  | No     | No   | Yes         | No         | Yes       | No       | No             |                                                                                                                                                                                    |
| Action on Hearing Loss                       | Yes                       | Yes       | Yes      | Yes          | Yes                   | No         | Yes   | Yes                 | Yes    | Yes  | Yes         | Yes        | Yes       | Yes      | No             |                                                                                                                                                                                    |
| American Speech-Language-Hearing Association | Yes                       | Yes       | Yes      | Yes          | Yes                   | No         | No    | Yes                 | No     | Yes  | Yes         | Yes        | Yes       | No       | Yes            | <ul style="list-style-type: none"> <li>• Difficulty concentrating or thinking clearly</li> </ul>                                                                                   |
| British Tinnitus Association                 | Yes                       | Yes       | Yes      | No           | Yes                   | No         | No    | Yes                 | No     | Yes  | Yes         | Yes        | Yes       | No       | No             | <ul style="list-style-type: none"> <li>• Recruitment</li> </ul>                                                                                                                    |
| Dizziness & Balance                          | Yes                       | Yes       | Yes      | Yes          | Yes                   | Yes        | No    | No                  | Yes    | Yes  | Yes         | Yes        | No        | Yes      | No             |                                                                                                                                                                                    |
| Hear.com                                     | Yes                       | No        | Yes      | No           | Yes                   | Yes        | Yes   | Yes                 | No     | No   | No          | No         | Yes       | No       | No             |                                                                                                                                                                                    |
| Hidden Hearing                               | Yes                       | No        | Yes      | Yes          | Yes                   | No         | No    | Yes                 | No     | Yes  | No          | No         | Yes       | No       | Yes            | <ul style="list-style-type: none"> <li>• Poor concentration</li> </ul>                                                                                                             |
| Hyperacusis Focus                            | Yes                       | Yes       | Yes      | Yes          | Yes                   | Yes        | No    | No                  | Yes    | Yes  | Yes         | Yes        | Yes       | No       | No             | <ul style="list-style-type: none"> <li>• Vestibular</li> <li>• Diplacusis</li> <li>• Recruitment.</li> </ul>                                                                       |
| Hyperacusis.net                              | Yes                       | No        | Yes      | Yes          | No                    | No         | No    | Yes                 | No     | Yes  | Yes         | Yes        | Yes       | No       | No             | <ul style="list-style-type: none"> <li>• Fullness in the ears</li> <li>• Loss of consciousness</li> <li>• Mental confusion</li> <li>• Nausea</li> <li>• Extreme fatigue</li> </ul> |
| NHS                                          | Yes                       | Yes       | Yes      | Yes          | Yes                   | Yes        | Yes   | Yes                 | Yes    | Yes  | Yes         | No         | Yes       | Yes      | No             | <ul style="list-style-type: none"> <li>• ‘school and work life can suffer’,</li> <li>• ‘very difficult to concentrate’</li> </ul>                                                  |
| South Tees NHS                               | Yes                       | No        | No       | No           | No                    | No         | No    | No                  | No     | No   | No          | No         | No        | No       | No             |                                                                                                                                                                                    |
| University of California San Francisco       | Yes                       | Yes       | Yes      | Yes          | Yes                   | No         | No    | Yes                 | No     | Yes  | Yes         | No         | Yes       | No       | No             |                                                                                                                                                                                    |
| Vestibular.org                               | Yes                       | Yes       | Yes      | No           | Yes                   | No         | No    | No                  | No     | No   | No          | No         | No        | Yes      | No             | <ul style="list-style-type: none"> <li>• Loss of balance or upright posture</li> <li>• Headache</li> </ul>                                                                         |
| WebMD                                        | Yes                       | Yes       | No       | No           | No                    | No         | No    | No                  | Yes    | No   | No          | No         | No        | No       | No             | <ul style="list-style-type: none"> <li>• Loss of balance</li> <li>• Seizures</li> </ul>                                                                                            |
| Wikipedia                                    | Yes                       | Yes       | Yes      | Yes          | Yes                   | No         | No    | Yes                 | Yes    | Yes  | Yes         | No         | No        | No       | Yes            |                                                                                                                                                                                    |

Phonophobia: fear of loud sounds. Misophonia: strong dislike or hatred of specific sounds.
